# Supplementary material for: Disparities in nutrition knowledge among college students: A cross-sectional study and factor analysis in Wuxi, China
Source: Research Square preprint supplement (doi:10.21203/rs.3.rs-8485476/v1), 2026-01-09
Supplement: Supplementary file 1 [file 21dffd7fcca8c87822ca8c1f.docx]

**Table S1. Scoring criteria for the items of nutrition and health knowledge**

| **Questionnaire Question** | **Score** | **Scoring Details** |
| --- | --- | --- |
| 1. For the following foods, what intake advice does the Dietary Guidelines for Chinese Residents recommend for the general population? | 12 points | 1.5 points per correct answer (total 8 food categories) |
| 2. Maximum daily salt intake for healthy adults | 2 points | Correct answer (5g): 2 points; Others: 0 points |
| Optimal maximum daily intake of added sugar | 2 points | Correct answer (25g): 2 points; Others: 0 points |
| Recommended daily intake of cooking oil | 2 points | Correct answer (25~30g): 2 points; Others: 0 points |
| 3. Correct statements about vegetables and fruits | 6 points | 1.5 points for each correct option (①②③); 1.5 points for not selecting the wrong option (④); Selecting "Don't Know" (⑤): 0 points |
| 4. Correct general dietary statements | 6 points | 1.5 points for each correct option (①②③④); Selecting "Don't Know" (⑤): 0 points |
| 5. Best source of calcium | 1.5 points | Correct answer (① Milk): 1.5 points; Others: 0 points |
| 6. Characteristics of whole grains/miscellaneous grains/legumes compared with refined grains | 6 points | 1.5 points for each correct option (①③④); 1.5 points for not selecting the wrong option (②); Selecting "Don't Know" (⑤): 0 points |
| 7. Foods rich in iron and easily absorbed | 6 points | 1.5 points for each correct option (①②④); 1.5 points for not selecting the wrong option (③); Selecting "Don't Know" (⑤): 0 points |
| 8. Foods for supplementing vitamin A | 6 points | 1.5 points for each correct option (②③④); 1.5 points for not selecting the wrong option (①); Selecting "Don't Know" (⑤): 0 points |
| 9. Food with high oil and salt content | 1.5 points | Correct answer (② Fried Potato Chips): 1.5 points; Others: 0 points |
| 10. Preferred meat for preventing dyslipidemia and cardiovascular diseases | 2 points | Correct answer (① Fish): 2 points; Others: 0 points |
| 11. Correct statements about salt and sugary beverages | 6 points | 1.5 points for each correct option (①②③④); Selecting "Don't Know" (⑤): 0 points |
| 12. Correct statements about disease prevention through diet | 6 points | 1.5 points for each correct option (①③④); 1.5 points for not selecting the wrong option (②); Selecting "Don't Know" (⑤): 0 points |
| 13. Product with higher protein content | 1.5 points | Correct answer (① Product 1): 1.5 points; Others: 0 points |
| 14. Product belonging to dairy products | 1.5 points | Correct answer (① Product 1): 1.5 points; Others: 0 points |
| 15. Estimation of food weights | 8 points | 2 points per correct estimation (total 4 food items) |
| 16. Nutritionally balanced lunch combination | 2 points | Correct answer (① Mixed Bean Rice + Braised Beef with Tomatoes + Sautéed Spinach): 2 points; Others: 0 points |
| 17. BMI weight category (26.1 kg/m²) | 2 points | Correct answer (③ Overweight): 2 points; Others: 0 points |
| 18. Methods to maintain healthy weight | 6 points | 1.5 points for each correct option (①②③④); Selecting "Don't Know" (⑤): 0 points |
| 19. Correct practices to avoid food waste | 6 points | 1.5 points for each correct option (①②④); 1.5 points for not selecting the wrong option (③); Selecting "Don't Know" (⑤): 0 points |
| 20. Correct statements about food safety and hygiene | 8 points | 2 points for each correct option (①④); 2 points for not selecting each wrong option (②③); Selecting "Don't Know" (⑤): 0 points |
