# Supplementary material for: Disparities in nutrition knowledge among college students: A cross-sectional study and factor analysis in Wuxi, China
Source: Research Square preprint supplement (doi:10.21203/rs.3.rs-8485476/v1), 2026-01-09
Supplement: Supplementary file 2 [file 9b63603099160bd7bf626ef4.docx]

**Text S1. Nutrition and health knowledge questionnaire**

**Dietary recommendations**

1. For the following foods, what intake advice does the Dietary Guidelines for Chinese Residents recommend for the general population? (Tick √ one option for each food category)

| Food Category | Eat More | Moderate Intake | Eat Less | No Preference | Don't Know |
| --- | --- | --- | --- | --- | --- |
| Vegetables | √ | □ | □ | □ | □ |
| Fruits | √ | □ | □ | □ | □ |
| Dairy Products | √ | □ | □ | □ | □ |
| Soybeans and Soy Products | √ | □ | □ | □ | □ |
| Fish, Poultry, and Lean Meat | □ | √ | □ | □ | □ |
| Eggs | □ | √ | □ | □ | □ |
| Processed Meat Products | □ | □ | √ | □ | □ |
| Sugar-Added Foods or Beverages | □ | □ | √ | □ | □ |

2. What is the maximum daily salt intake recommended for healthy adults? (Tick √ only one option)

| Item | 5g | 10g | 15g | 20g | Don't Know |
| --- | --- | --- | --- | --- | --- |
| Salt | √ | □ | □ | □ | □ |

What is the optimal maximum daily intake of added sugar? (Tick √ only one option)

*Added sugar: Sugar or syrup added to foods or beverages, such as white sugar, brown sugar, granulated sugar, corn syrup, etc.*

| Item | 15g | 25g | 35g | 45g | Don't Know |
| --- | --- | --- | --- | --- | --- |
| Added Sugar | □ | √ | □ | □ | □ |

What is the recommended daily intake of cooking oil? (Tick √ only one option)

| Item | 10~25g | 25~30g | 30~50g | 50~75g | Don't Know |
| --- | --- | --- | --- | --- | --- |
| Cooking Oil | □ | √ | □ | □ | □ |

3. Which of the following statements about vegetables and fruits are correct? (Multiple choices allowed)

① Vegetables should be included in every meal √

② Dark-colored vegetables (e.g., leafy greens, carrots, tomatoes) should be consumed more, accounting for at least half of the total vegetable intake √

③ Fruits should be eaten every day √

④ Vegetables and fruits can replace each other □

⑤ Don't Know □

4. Which of the following statements are correct? (Multiple choices allowed)

① For adults, no single food can meet all the nutritional needs of the human body √

② Daily diet should include: grains and tubers, vegetables and fruits, livestock, poultry, fish, eggs, milk, as well as soybeans and nuts √

③ Achieving dietary diversity is easier through combining whole grains with refined grains, meat with vegetables, and various colors of foods √

④ On average, more than 12 kinds of foods should be eaten per day and more than 25 kinds per week √

⑤ Don't Know □

**Food characteristics**

5. Which of the following foods is the best source of calcium? (Single choice)

① Milk √

② Bone Broth □

③ Lactic Acid Beverages □

④ Soy Milk □

⑤ Don't Know □

6. Compared with refined grains such as rice and white flour, whole grains (e.g., brown rice, whole wheat), miscellaneous grains (e.g., oats, millet, corn), and legumes (e.g., mung beans, adzuki beans) have which of the following characteristics? (Multiple choices allowed)

① Provide more B vitamins √

② Cause blood sugar to rise more easily □

③ Provide more minerals √

④ Provide more dietary fiber √

⑤ Don't Know □

7. Which of the following foods are rich in iron and easily absorbed and utilized by the human body? (Multiple choices allowed)

① Duck Blood √

② Pork Liver √

③ Spinach □

④ Beef √

⑤ Don't Know □

8. To supplement a large amount of vitamin A, which of the following foods can be consumed? (Multiple choices allowed)

① Chinese Cabbage □

② Chicken Liver √

③ Carrots √

④ Oranges √

⑤ Don't Know □

9. Which of the following foods contains relatively high amounts of oil and salt? (Single choice)

① Walnuts □

② Fried Potato Chips √

③ Plain Melon Seeds □

④ Milk □

⑤ Don't Know □

**Nutrition and disease**

10. From the perspective of preventing dyslipidemia and cardiovascular diseases, which type of meat should be preferred? (Single choice)

① Fish √

② Pork □

③ Lamb □

④ Beef □

⑤ Don't Know □

11. Which of the following statements are correct? (Multiple choices allowed)

① Excessive salt intake can increase the risk of hypertension and stroke √

② Excessive salt intake can increase the risk of gastric cancer √

③ Drinking too many sugary beverages can increase the risk of dental caries √

④ Drinking too many sugary beverages can increase the risk of obesity and diabetes √

⑤ Don't Know □

12. Which of the following statements are correct? (Multiple choices allowed)

① Reducing intake of refined staple foods helps prevent diabetes √

② Eating more animal fat helps prevent stroke □

③ Reducing intake of processed meat products helps prevent cancer √

④ Eating more leafy greens helps prevent cardiovascular diseases √

⑤ Don't Know □

Read the food labels of the following two products and answer questions 13 and 14.

**Product 1**

Ingredients: Raw Cow's Milk

Nutrition Facts Table

| Item | Per 100ml | NRV% |
| --- | --- | --- |
| Energy | 309kJ | 4% |
| Protein | 3.6g | 6% |
| Fat | 4.4g | 7% |
| Carbohydrates | 5.0g | 2% |
| Sodium | 58mg | 3% |
| Calcium | 120mg | 15% |

**Product 2**

Ingredients: Water, Raw Cow's Milk, White Granulated Sugar, Full-Fat Milk Powder, High-Fructose Corn Syrup, Food Additives [Citric Acid, Lactic Acid, L-Malic Acid, Sodium Cyclamate, Acesulfame-K, Aspartame]

Nutrition Facts Table

| Item | Per 100ml | NRV% |
| --- | --- | --- |
| Energy | 128kJ | 2% |
| Protein | 1.0g | 2% |
| Fat | 1.4g | 2% |
| Carbohydrates | 3.5g | 1% |
| Sodium | 80mg | 4% |

13. Which product contains higher protein per 100ml, Product 1 or Product 2? (Single choice)

① Product 1 √

② Product 2 □

③ Equal □

④ Don't Know □

14. Which of the two products do you think belongs to dairy products? (Single choice)

① Product 1 √

② Product 2 □

③ Both □

④ Neither □

⑤ Don't Know □

**Food selection**

15. Please estimate the weight of the following foods? (Tick √ one option for each food category)

| Weight Options | 10g | 20g | 50g | 100g | 200g | Don't Know |
| --- | --- | --- | --- | --- | --- | --- |
| Food 1 | □ | □ | □ | √ | □ | □ |
| Food 2 | □ | □ | √ | □ | □ | □ |
| Food 3 | □ | □ | √ | □ | □ | □ |
| Food 4 | □ | □ | □ | √ | □ | □ |

16. Which of the following lunch combinations is more nutritionally balanced? (Single choice)

① Mixed Bean Rice + Braised Beef with Tomatoes + Sautéed Spinach √

② Steamed Bun + Vinegar-Flavored Shredded Potatoes + Sautéed Zucchini □

③ Chicken Burger + French Fries + Beverage □

④ Braised Pork Ribs + Braised Fish + Sautéed Rape □

⑤ Don't Know □

17. If an adult's Body Mass Index (BMI = weight/height²) is 26.1 kg/m², which weight category do they belong to? (Single choice)

① Normal □

② Underweight □

③ Overweight √

④ Obesity □

⑤ Don't Know □

18. Which of the following methods help maintain a healthy weight? (Multiple choices allowed)

① Manage diet and avoid overeating √

② Maintain appropriate physical activity every day √

③ Learn to read food labels and eat fewer high-energy foods √

④ Pay attention to the energy provided by foods and combine them reasonably √

⑤ Don't Know □

19. To avoid food waste, which of the following practices are correct? (Multiple choices allowed)

① Purchase ingredients on demand and avoid excess √

② Avoid over-processing food to reduce kitchen waste √

③ Continue eating the remaining food even when full □

④ Order food according to the number of people when dining out and avoid extravagance √

⑤ Don't Know □

**Food safety**

20. Which of the following statements are correct? (Multiple choices allowed)

① Use different cutting boards for raw meat and cooked meat √

② Rinse the knife used for cutting raw meat with water before using it for cooked meat □

③ There is no need for serving spoons and chopsticks when eating at home □

④ Use serving spoons and chopsticks when dining with friends √

⑤ Don't Know □
